# Supplementary material
Source: publisher site journal article supplement (https://www.spandidos-publications.com/6159/downloadSupplementary)
Supplement: Supplementary file 1 [file downloadSupplementary]

## Sheet: Table S4
Table SIV. GO biological processes and KEGG pathway enrichment analysis of 48 DEGs co-expressed with FSCN1 in laryngeal squamous cell carcinoma.
GO biological processes enrichment analysis
Category	Term	Count	%	PValue	Genes	List Total	Pop Hits	Pop Total	Fold Enrichment	Bonferroni	Benjamini	FDR
GOTERM_BP_DIRECT	GO:0051607~defense response to virus	6	13.6364	7.79827e-05	IFITM1, IFI27, ZC3H12A, IFIT3, IFIT2, OASL	38	233	19308	13.0843	0.020836	0.0210553	0.0210553
GOTERM_BP_DIRECT	GO:0009615~response to virus	4	9.09091	0.00124618	IFITM1, IFIT3, IFIT2, OASL	38	111	19308	18.3101	0.285863	0.168235	0.168235
GOTERM_BP_DIRECT	GO:0035457~cellular response to interferon-alpha	2	4.54545	0.0246351	IFIT3, IFIT2	38	13	19308	78.17	0.998811	1	1
GOTERM_BP_DIRECT	GO:0045087~innate immune response	5	11.3636	0.026963	IFI27, SLC15A3, IFIT3, IFIT2, OASL	38	599	19308	4.24128	0.999376	1	1
GOTERM_BP_DIRECT	GO:0015804~neutral amino acid transport	2	4.54545	0.033952	SLC7A8, SLC38A2	38	18	19308	56.4561	0.999911	1	1
KEGG pathway enrichment analysis
Category	Term	Count	%	PValue	Genes	List Total	Pop Hits	Pop Total	Fold Enrichment	Bonferroni	Benjamini	FDR
KEGG_PATHWAY	hsa01240:Biosynthesis of cofactors	4	9.09091	0.00582219	PPCS, MTHFD2L, COQ6, AK9	21	153	8164	10.1637	0.347055	0.42502	0.42502
KEGG_PATHWAY	hsa01100:Metabolic pathways	9	20.4545	0.0230203	SQLE, CYP26B1, PPCS, GPX3, MTHFD2L, L3HYPDH, SGPP1, COQ6, AK9	21	1540	8164	2.27199	0.81734	0.840241	0.840241
